# Supplementary material for: Controllable synthesis of hierarchical Au/PdAg heterostructures consisting of nanosheets on nanorods with plasmon-enhanced electrocatalytic properties
Source: Royal Society of Chemistry journal article supplement (doi:10.1039/d0qi00945h), 2020-01-01
Supplement: d0qi00945h1.pdf [file d0qi00945h1.pdf]

## Electronic Supplementary Information (ESI)

### Controllable synthesis of hierarchical Au/PdAg heterostructures consisting of nanosheets on nanorods with plasmon-enhanced electrocatalytic properties

Zhiqiang Ge,<sup>‡</sup> Cheng Wang<sup>‡</sup> and Limin Qi<sup>\*</sup>

*Beijing National Laboratory for Molecular Sciences (BNLMS), College of Chemistry, Peking University, Beijing 100871, China. E-mail: liminqi@pku.edu.cn*

### Contents

|                                                                                         |   |
|-----------------------------------------------------------------------------------------|---|
| Figure S1. Length and width distribution diagram of GNRs.....                           | 2 |
| Figure S2. TEM and HRTEM images of Au/Pd NRNBs.....                                     | 2 |
| Figure S3. TEM and HRTEM images of Au/PdAg NRNDs.....                                   | 2 |
| Figure S4. Length and width distribution diagram of Au/PdAg NRNSs.....                  | 3 |
| Figure S5. TEM and HRTEM images of Au/PdAg NRNSs.....                                   | 3 |
| Figure S6. TEM images of Au/PdAg nanostructures with different CTAB concentrations..... | 4 |
| Figure S7. TEM images of Au/PdAg nanostructures with different DTAB concentrations..... | 4 |

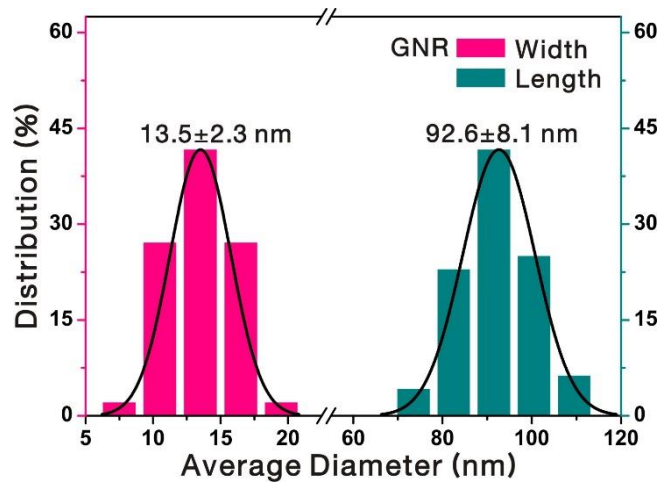

**Fig. S1** Length and width distribution diagram of GNRs.

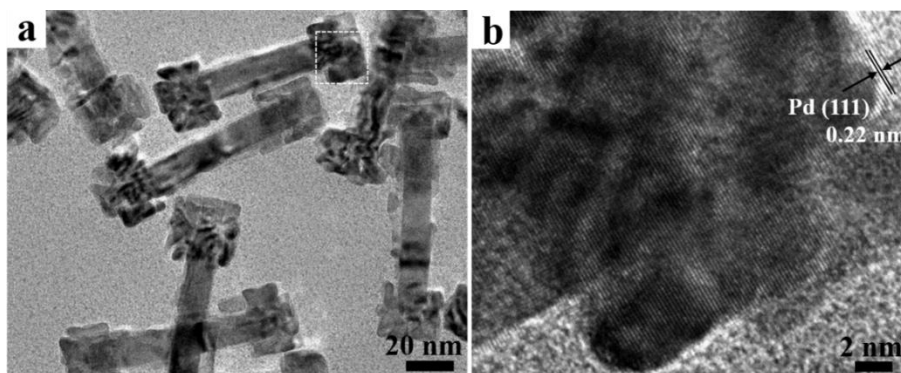

**Fig. S2** TEM (a) and HRTEM (b) images of Au/Pd NRNBs. The HRTEM image in panel b corresponds to the framed area in panel a.

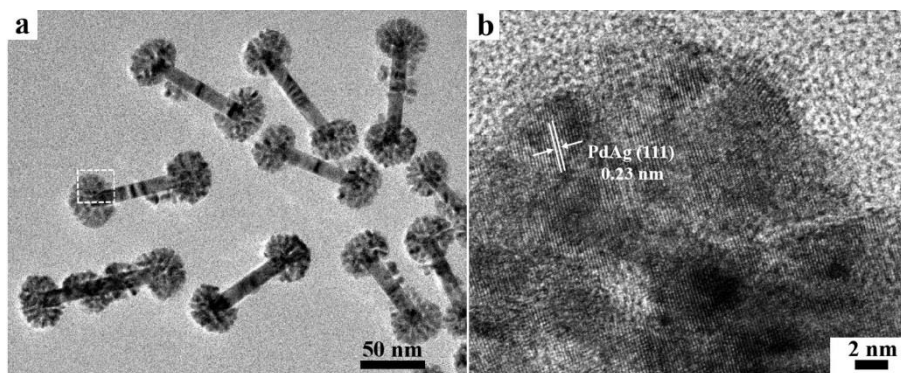

**Fig. S3** TEM (a) and HRTEM (b) images of Au/PdAg NRNDs. The HRTEM image in panel b corresponds to the framed area in panel a.

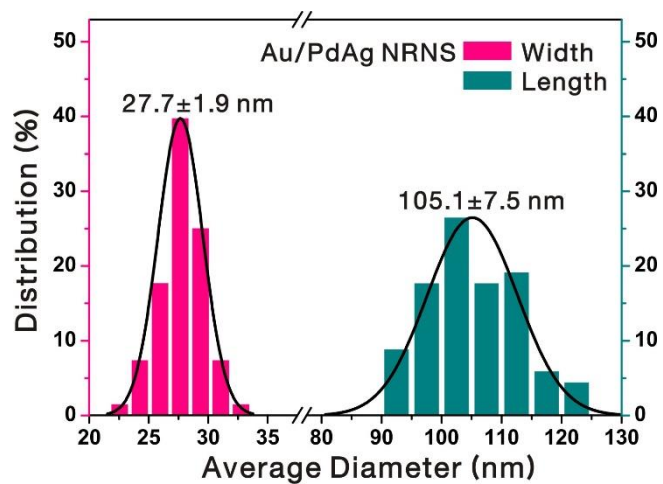

**Fig. S4** Length and width distribution diagram of Au/PdAg NRNSs.

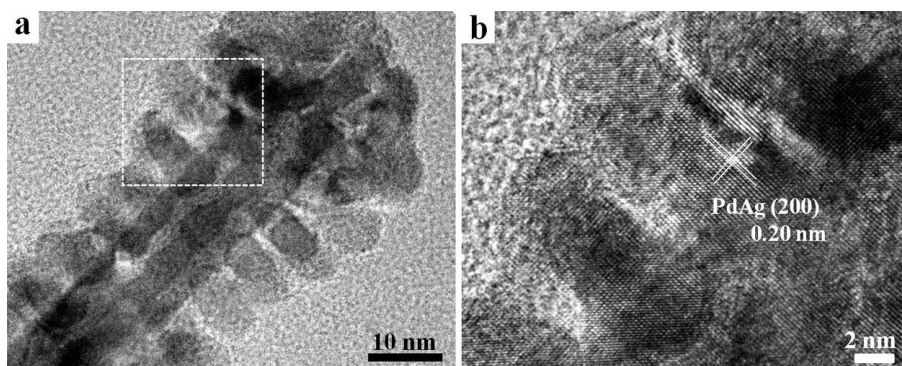

**Fig. S5** TEM (a) and HRTEM (b) images of Au/PdAg NRNSs. The HRTEM image in panel b corresponds to the framed area in panel a.

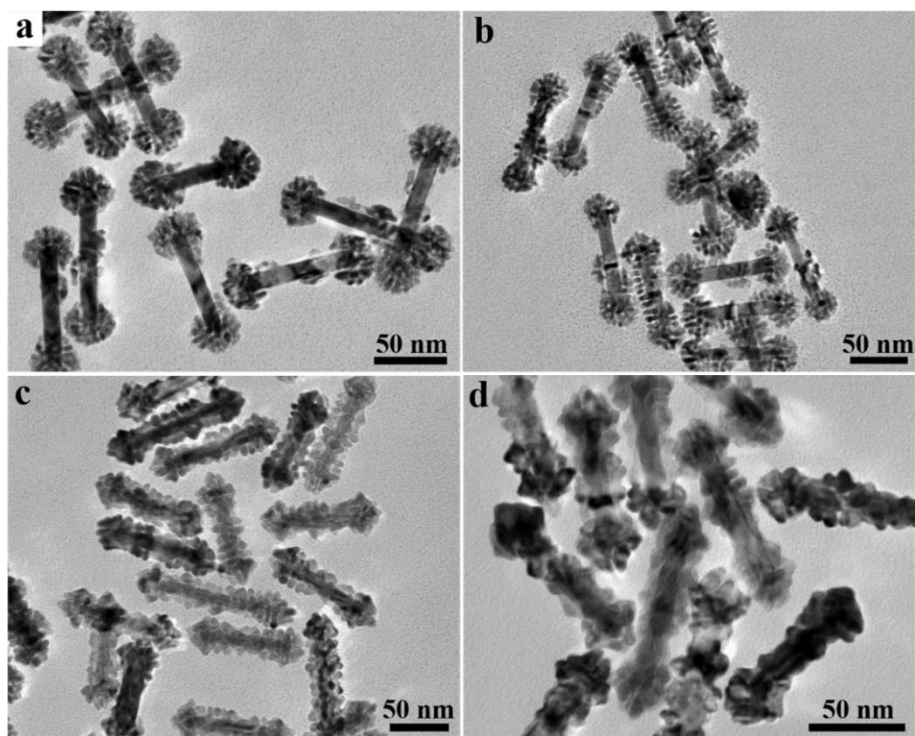

**Fig. S6** TEM images of Au/PdAg hybrid nanostructures obtained in the mixed DTAB/CTAB system with different CTAB concentrations: (a) 0.12 mM; (b) 0.17 mM; (c) 5.0 mM; (d) 10 mM. The DTAB concentration was kept 3 mM.

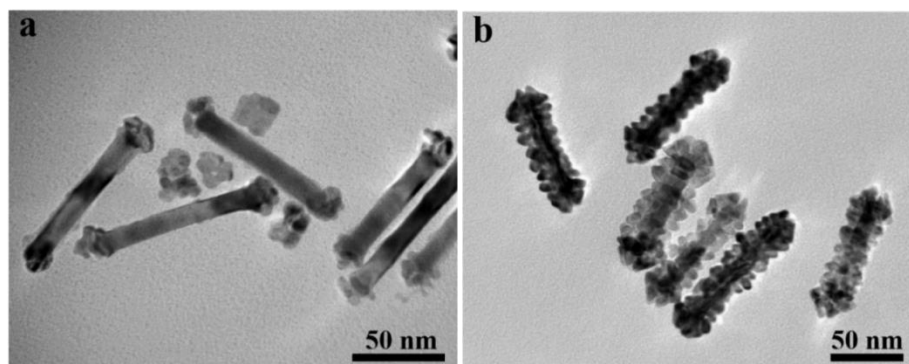

**Fig. S7** TEM images of Au/PdAg hybrid nanostructures obtained in the mixed DTAB/CTAB system with different DTAB concentrations: (a) 0 mM; (b) 10 mM. The CTAB concentration was kept 1 mM.
